# Supplementary material for: Circulating ectosomes: Determination of angiogenic microRNAs in type 2 diabetes
Source: PubMed Central journal article supplement — Theranostics. 2018 Jun 23;8(14):3874–90. doi: 10.7150/thno.23334 (PMC6071541; doi:10.7150/thno.23334), 2018-06-23
Supplement: thnov08p3874s1.pdf [file thnov08p3874s1.pdf]

Supplementary Table 1. LNA primers against 179 circulating miRNAs used for plate screening.

| miRname (human) | Order in 384<br>(for sorting by row) | Order in 384<br>(for sorting by column) | Panel plate position | microRNA target sequence | Corresponding LNA™ microRNA<br>PCR primer set (Prod No) | Sample | Assay type | Comments                                                 |
|-----------------|--------------------------------------|-----------------------------------------|----------------------|--------------------------|---------------------------------------------------------|--------|------------|----------------------------------------------------------|
| hsa-miR-20a     | 1                                    | 1                                       | A01                  | UAAAGUGCUUUAJAGUGCAGGUAG | 204292                                                  | S1     | GOI        |                                                          |
| hsa-miR-497     | 2                                    | 17                                      | A02                  | CAGCAGCACACUGUGGUUUUGU   | 204354                                                  | S1     | GOI        |                                                          |
| hsa-miR-19b     | 3                                    | 33                                      | A03                  | UGUGCAAUCCAUGCAAACUGA    | 204450                                                  | S1     | GOI        |                                                          |
| hsa-miR-532-3p  | 4                                    | 49                                      | A04                  | CCUCCACACCCAAGGCUUGCA    | 204003                                                  | S1     | GOI        |                                                          |
| hsa-miR-126     | 5                                    | 65                                      | A05                  | UCGUACCGUGAGUUAUAUGCG    | 204227                                                  | S1     | GOI        |                                                          |
| hsa-miR-142-5p  | 6                                    | 81                                      | A06                  | CAUAAAGUAGAAAGCACUACU    | 204722                                                  | S1     | GOI        |                                                          |
| hsa-miR-24      | 7                                    | 97                                      | A07                  | UGGUCUAGUUCAGCAGGAACAG   | 204260                                                  | S1     | GOI        |                                                          |
| hsa-miR-210     | 8                                    | 113                                     | A08                  | CUGUGCGUGGACAGCGGCUGA    | 204333                                                  | S1     | GOI        |                                                          |
| hsa-miR-223     | 9                                    | 129                                     | A09                  | UGUCAGUUUGUCAAAUACCCCA   | 204256                                                  | S1     | GOI        |                                                          |
| hsa-let-7a      | 10                                   | 145                                     | A10                  | UGAGGUAGUAGGUUGUAUAGUU   | 204775                                                  | S1     | GOI        |                                                          |
| hsa-miR-15a     | 11                                   | 161                                     | A11                  | UAGCAGCACUAUUGGUUUUGUG   | 204066                                                  | S1     | GOI        |                                                          |
| hsa-miR-30e     | 12                                   | 177                                     | A12                  | UGUAAACAUCUUGACUGGAAG    | 204774                                                  | S1     | GOI        |                                                          |
| hsa-miR-21      | 13                                   | 193                                     | A13                  | UAGCUUAUCAGACUGAUGUUGA   | 204230                                                  | S1     | GOI        |                                                          |
| hsa-miR-140-5p  | 14                                   | 209                                     | A14                  | CAGUGGUUUUACCCUAUGGUAG   | 204540                                                  | S1     | GOI        |                                                          |
| hsa-miR-150     | 15                                   | 225                                     | A15                  | UCUCCCAACCCUUGUACCAAGUG  | 204660                                                  | S1     | GOI        |                                                          |
| hsa-miR-328     | 16                                   | 241                                     | A16                  | CUGGCCUCUCUGCCCUUCCGU    | 204364                                                  | S1     | GOI        |                                                          |
| hsa-miR-23a     | 17                                   | 257                                     | A17                  | AUCAUUGCCAGGGAUUUC       | 204772                                                  | S1     | GOI        |                                                          |
| UniSp3 IPC      | 18                                   | 273                                     | A18                  |                          |                                                         | S1     | IPC        | Inter-plate calibrator                                   |
| UniSp3 IPC      | 19                                   | 289                                     | A19                  |                          |                                                         | S1     | IPC        | Inter-plate calibrator                                   |
| hsa-miR-16-2*   | 20                                   | 305                                     | A20                  | CCAAUAUACUGUGCGUUUA      | 204309                                                  | S1     | GOI        |                                                          |
| hsa-miR-320a    | 21                                   | 321                                     | A21                  | AAAAGCUGGGUUGAGAGGGCGA   | 204154                                                  | S1     | GOI        |                                                          |
| hsa-miR-339-5p  | 22                                   | 337                                     | A22                  | UCCUGUCCUCCAGGAGCUCACG   | 204153                                                  | S1     | GOI        |                                                          |
| hsa-miR-451     | 23                                   | 353                                     | A23                  | AAACCGUUAACUUAUCUGAGUU   | 204734                                                  | S1     | GOI        | May be useful as quality control for sample purification |
| hsa-miR-451     | 24                                   | 369                                     | A24                  | AAACCGUUAACUUAUCUGAGUU   | 204734                                                  | S1     | GOI        | May be useful as quality control for sample purification |
| hsa-miR-20a     | 25                                   | 2                                       | B01                  | UAAAGUGCUUUAJAGUGCAGGUAG | 204292                                                  | S2     | GOI        |                                                          |
| hsa-miR-497     | 26                                   | 18                                      | B02                  | CAGCAGCACACUGUGGUUUUGU   | 204354                                                  | S2     | GOI        |                                                          |
| hsa-miR-19b     | 27                                   | 34                                      | B03                  | UGUGCAAUCCAUGCAAACUGA    | 204450                                                  | S2     | GOI        |                                                          |
| hsa-miR-532-3p  | 28                                   | 50                                      | B04                  | CCUCCACACCCAAGGCUUGCA    | 204003                                                  | S2     | GOI        |                                                          |
| hsa-miR-126     | 29                                   | 66                                      | B05                  | UCGUACCGUGAGUUAUAUGCG    | 204227                                                  | S2     | GOI        |                                                          |
| hsa-miR-142-5p  | 30                                   | 82                                      | B06                  | CAUAAAGUAGAAAGCACUACU    | 204722                                                  | S2     | GOI        |                                                          |
| hsa-miR-24      | 31                                   | 98                                      | B07                  | UGGUCUAGUUCAGCAGGAACAG   | 204260                                                  | S2     | GOI        |                                                          |
| hsa-miR-210     | 32                                   | 114                                     | B08                  | CUGUGCGUGGACAGCGGCUGA    | 204333                                                  | S2     | GOI        |                                                          |
| hsa-miR-223     | 33                                   | 130                                     | B09                  | UGUCAGUUUGUCAAAUACCCCA   | 204256                                                  | S2     | GOI        |                                                          |
| hsa-let-7a      | 34                                   | 146                                     | B10                  | UGAGGUAGUAGGUUGUAUAGUU   | 204775                                                  | S2     | GOI        |                                                          |
| hsa-miR-15a     | 35                                   | 162                                     | B11                  | UAGCAGCACUAUUGGUUUUGUG   | 204066                                                  | S2     | GOI        |                                                          |
| hsa-miR-30e     | 36                                   | 178                                     | B12                  | UGUAAACAUCUUGACUGGAAG    | 204774                                                  | S2     | GOI        |                                                          |
| hsa-miR-21      | 37                                   | 194                                     | B13                  | UAGCUUAUCAGACUGAUGUUGA   | 204230                                                  | S2     | GOI        |                                                          |
| hsa-miR-140-5p  | 38                                   | 210                                     | B14                  | CAGUGGUUUUACCCUAUGGUAG   | 204540                                                  | S2     | GOI        |                                                          |
| hsa-miR-150     | 39                                   | 226                                     | B15                  | UCUCCCAACCCUUGUACCAAGUG  | 204660                                                  | S2     | GOI        |                                                          |
| hsa-miR-328     | 40                                   | 242                                     | B16                  | CUGGCCUCUCUGCCCUUCCGU    | 204364                                                  | S2     | GOI        |                                                          |
| hsa-miR-23a     | 41                                   | 258                                     | B17                  | AUCAUUGCCAGGGAUUUC       | 204772                                                  | S2     | GOI        |                                                          |
| UniSp3 IPC      | 42                                   | 274                                     | B18                  |                          |                                                         | S2     | IPC        | Inter-plate calibrator                                   |
| UniSp3 IPC      | 43                                   | 290                                     | B19                  |                          |                                                         | S2     | IPC        | Inter-plate calibrator                                   |
| hsa-miR-16-2*   | 44                                   | 306                                     | B20                  | CCAAUAUACUGUGCGUUUA      | 204309                                                  | S2     | GOI        |                                                          |
| hsa-miR-320a    | 45                                   | 322                                     | B21                  | AAAAGCUGGGUUGAGAGGGCGA   | 204154                                                  | S2     | GOI        |                                                          |
| hsa-miR-339-5p  | 46                                   | 338                                     | B22                  | UCCUGUCCUCCAGGAGCUCACG   | 204153                                                  | S2     | GOI        |                                                          |
| hsa-miR-451     | 47                                   | 354                                     | B23                  | AAACCGUUAACUUAUCUGAGUU   | 204734                                                  | S2     | GOI        | May be useful as quality control for sample purification |
| hsa-miR-451     | 48                                   | 370                                     | B24                  | AAACCGUUAACUUAUCUGAGUU   | 204734                                                  | S2     | GOI        | May be useful as quality control for sample purification |
| hsa-miR-106a    | 49                                   | 3                                       | C01                  | AAAAGUGCUUACAGUGCAGGUAG  | 204563                                                  | S1     | GOI        |                                                          |
| hsa-miR-144*    | 50                                   | 19                                      | C02                  | GGUAUUAUCAUUAUCUGUAAG    | 204670                                                  | S1     | GOI        |                                                          |
| hsa-miR-142-3p  | 51                                   | 35                                      | C03                  | UGUAGUGUUUCUACUUUAUGGA   | 204291                                                  | S1     | GOI        |                                                          |
| hsa-miR-339-3p  | 52                                   | 51                                      | C04                  | UGAGGCCUCCGACGACAGGCCG   | 204160                                                  | S1     | GOI        |                                                          |
| hsa-miR-486-5p  | 53                                   | 67                                      | C05                  | UCCUGUACUGAGCUGCCCGAG    | 204001                                                  | S1     | GOI        |                                                          |
| hsa-miR-584     | 54                                   | 83                                      | C06                  | UUUUGGUUUUGCCUGGGACUGAG  | 204568                                                  | S1     | GOI        |                                                          |
| hsa-miR-320b    | 55                                   | 99                                      | C07                  | AAAAGCUGGGUUGAGAGGGCAA   | 204524                                                  | S1     | GOI        |                                                          |
| hsa-let-7e      | 56                                   | 115                                     | C08                  | UGAGGUAGGGUUGUAUAGUU     | 204428                                                  | S1     | GOI        |                                                          |

Supplementary Table 1. LNA primers against 179 circulating miRNAs used for plate screening.

|                |     |     |     |                          |        |    |     |                                                          |
|----------------|-----|-----|-----|--------------------------|--------|----|-----|----------------------------------------------------------|
| hsa-let-7g     | 57  | 131 | C09 | UGAGGUAGUAGUUUGUACAGUU   | 204565 | S1 | GOI |                                                          |
| hsa-miR-205    | 58  | 147 | C10 | UCCUUCAUUCCACCGGAGUCUG   | 204487 | S1 | GOI |                                                          |
| hsa-miR-27a    | 59  | 163 | C11 | UUCACAGUGGCUAAGUUCGCG    | 204764 | S1 | GOI |                                                          |
| hsa-miR-28-3p  | 60  | 179 | C12 | CACUAGAUUGUGAGCUCUGGA    | 204119 | S1 | GOI |                                                          |
| hsa-miR-15b    | 61  | 195 | C13 | UAGCAGCACAUCAUGGUUUACA   | 204243 | S1 | GOI |                                                          |
| hsa-miR-155    | 62  | 211 | C14 | UUAUUGCUAAUCCUGUAUAGGGGU | 204308 | S1 | GOI |                                                          |
| hsa-miR-101    | 63  | 227 | C15 | UACAGUACUGUGAUAAACUGAA   | 204786 | S1 | GOI |                                                          |
| hsa-miR-374a   | 64  | 243 | C16 | UUAUAAUACAACCUAGUAAGUG   | 204758 | S1 | GOI |                                                          |
| hsa-miR-26a    | 65  | 259 | C17 | UUCAAGUAAUCCAGGAUAGGCU   | 204724 | S1 | GOI |                                                          |
| UniSp3 IPC     | 66  | 275 | C18 |                          |        | S1 | IPC | Inter-plate calibrator                                   |
| UniSp3 IPC     | 67  | 291 | C19 |                          |        | S1 | IPC | Inter-plate calibrator                                   |
| hsa-miR-92a    | 68  | 307 | C20 | UAUUGCACUUGUCCGGCCUGU    | 204258 | S1 | GOI |                                                          |
| hsa-miR-221    | 69  | 323 | C21 | AGCUACAUUGUCUGCGGGUUUC   | 204532 | S1 | GOI |                                                          |
| hsa-miR-28-5p  | 70  | 339 | C22 | AAGGAGCUCACAGUCUAUUGAG   | 204322 | S1 | GOI |                                                          |
| hsa-miR-16     | 71  | 355 | C23 | UAGCAGCACGUAUUUUGGCG     | 204409 | S1 | GOI | May be useful as quality control for sample purification |
| hsa-miR-16     | 72  | 371 | C24 | UAGCAGCACGUAUUUUGGCG     | 204409 | S1 | GOI | May be useful as quality control for sample purification |
| hsa-miR-106a   | 73  | 4   | D01 | AAAAGUGCUUACAGUGCAGGUAG  | 204563 | S2 | GOI |                                                          |
| hsa-miR-144*   | 74  | 20  | D02 | GGUAUACAUAUACUGUAAG      | 204670 | S2 | GOI |                                                          |
| hsa-miR-142-3p | 75  | 36  | D03 | UGUAGUGUUUCCUACUUUAUGGA  | 204291 | S2 | GOI |                                                          |
| hsa-miR-339-3p | 76  | 52  | D04 | UGAGCGCCUCGACGACAGCCG    | 204160 | S2 | GOI |                                                          |
| hsa-miR-486-5p | 77  | 68  | D05 | UCCUGUACUGAGCUGCCCCGAG   | 204001 | S2 | GOI |                                                          |
| hsa-miR-584    | 78  | 84  | D06 | UUAUGGUUUGCCUGGGACUGAG   | 204568 | S2 | GOI |                                                          |
| hsa-miR-320b   | 79  | 100 | D07 | AAAAGCUGGGUUGAGAGGGCAA   | 204524 | S2 | GOI |                                                          |
| hsa-let-7e     | 80  | 116 | D08 | UGAGGUAGGAGGUUGUAUAGUU   | 204428 | S2 | GOI |                                                          |
| hsa-let-7g     | 81  | 132 | D09 | UGAGGUAGUAGUUUGUACAGUU   | 204565 | S2 | GOI |                                                          |
| hsa-miR-205    | 82  | 148 | D10 | UCCUUCAUUCCACCGGAGUCUG   | 204487 | S2 | GOI |                                                          |
| hsa-miR-27a    | 83  | 164 | D11 | UUCACAGUGGCUAAGUUCGCG    | 204764 | S2 | GOI |                                                          |
| hsa-miR-28-3p  | 84  | 180 | D12 | CACUAGAUUGUGAGCUCUGGA    | 204119 | S2 | GOI |                                                          |
| hsa-miR-15b    | 85  | 196 | D13 | UAGCAGCACAUCAUGGUUUACA   | 204243 | S2 | GOI |                                                          |
| hsa-miR-155    | 86  | 212 | D14 | UUAUUGCUAAUCCUGUAUAGGGGU | 204308 | S2 | GOI |                                                          |
| hsa-miR-101    | 87  | 228 | D15 | UACAGUACUGUGAUAAACUGAA   | 204786 | S2 | GOI |                                                          |
| hsa-miR-374a   | 88  | 244 | D16 | UUAUAAUACAACCUAGUAAGUG   | 204758 | S2 | GOI |                                                          |
| hsa-miR-26a    | 89  | 260 | D17 | UUCAAGUAAUCCAGGAUAGGCU   | 204724 | S2 | GOI |                                                          |
| UniSp3 IPC     | 90  | 276 | D18 |                          |        | S2 | IPC | Inter-plate calibrator                                   |
| UniSp3 IPC     | 91  | 292 | D19 |                          |        | S2 | IPC | Inter-plate calibrator                                   |
| hsa-miR-92a    | 92  | 308 | D20 | UAUUGCACUUGUCCGGCCUGU    | 204258 | S2 | GOI |                                                          |
| hsa-miR-221    | 93  | 324 | D21 | AGCUACAUUGUCUGCGGGUUUC   | 204532 | S2 | GOI |                                                          |
| hsa-miR-28-5p  | 94  | 340 | D22 | AAGGAGCUCACAGUCUAUUGAG   | 204322 | S2 | GOI |                                                          |
| hsa-miR-16     | 95  | 356 | D23 | UAGCAGCACGUAUUUUGGCG     | 204409 | S2 | GOI | May be useful as quality control for sample purification |
| hsa-miR-16     | 96  | 372 | D24 | UAGCAGCACGUAUUUUGGCG     | 204409 | S2 | GOI | May be useful as quality control for sample purification |
| hsa-miR-185    | 97  | 5   | E01 | UGGAGAGAAAGGCAGUCCUGA    | 204475 | S1 | GOI |                                                          |
| hsa-miR-20b    | 98  | 21  | E02 | CAAAGUGCUCAUAGUCAGGUAG   | 204755 | S1 | GOI |                                                          |
| hsa-miR-107    | 99  | 37  | E03 | AGCAGCAUUGUACAGGGCUAUA   | 204468 | S1 | GOI |                                                          |
| hsa-miR-502-3p | 100 | 53  | E04 | AAUGCACCUGGGCAAGGAUUA    | 204043 | S1 | GOI |                                                          |
| hsa-miR-222    | 101 | 69  | E05 | AGCUACAUCUGGCUCUAGGGU    | 204551 | S1 | GOI |                                                          |
| hsa-miR-93*    | 102 | 85  | E06 | ACUGCUGAGCUAGCACUUCGCG   | 204470 | S1 | GOI |                                                          |
| hsa-miR-342-3p | 103 | 101 | E07 | UCUCACACAGAAAUCGCACCCGU  | 204511 | S1 | GOI |                                                          |
| hsa-miR-30a    | 104 | 117 | E08 | UGUAAACAUCUCCGACUGGAAG   | 204791 | S1 | GOI |                                                          |
| hsa-miR-1974   | 105 | 133 | E09 | UGGUUGUAGUCCUGCGAGAAUA   | 204662 | S1 | GOI | Obsolete in miRbase 16                                   |
| hsa-miR-29b    | 106 | 149 | E10 | UAGCACCAUUUGAAAUCAGUGUU  | 204679 | S1 | GOI |                                                          |
| hsa-miR-23b    | 107 | 165 | E11 | AUCAUUGCCAGGGAAUUAACC    | 204790 | S1 | GOI |                                                          |
| hsa-miR-505    | 108 | 181 | E12 | CGUACAACUUGCUGGUUUCCU    | 204214 | S1 | GOI |                                                          |
| hsa-miR-423-3p | 109 | 197 | E13 | AGCUCGGUCUGAGGCCUUCAGU   | 204488 | S1 | GOI |                                                          |
| hsa-miR-223*   | 110 | 213 | E14 | CGUGUAUUUGACAAGCUGAGUU   | 204529 | S1 | GOI |                                                          |
| hsa-miR-30b    | 111 | 229 | E15 | UGUAAACAUCUACACUCAGCU    | 204765 | S1 | GOI |                                                          |
| hsa-miR-532-5p | 112 | 245 | E16 | CAUGCCUUGAGUUGAGGACCGU   | 204221 | S1 | GOI |                                                          |
| hsa-let-7f     | 113 | 261 | E17 | UGAGGUAGUAGUAUUGUAUAGUU  | 204359 | S1 | GOI |                                                          |
| UniSp3 IPC     | 114 | 277 | E18 |                          |        | S1 | IPC | Inter-plate calibrator                                   |
| UniSp3 IPC     | 115 | 293 | E19 |                          |        | S1 | IPC | Inter-plate calibrator                                   |

Supplementary Table 1. LNA primers against 179 circulating miRNAs used for plate screening.

|                |     |     |     |                         |        |    |       |                        |
|----------------|-----|-----|-----|-------------------------|--------|----|-------|------------------------|
| hsa-miR-106b*  | 116 | 309 | E20 | CCGCACUGUGGGUACUUGCUGC  | 204020 | S1 | GOI   |                        |
| hsa-miR-181a   | 117 | 325 | E21 | AACAUUCAACGCUGUCGGUGAGU | 204566 | S1 | GOI   |                        |
| hsa-miR-15b*   | 118 | 341 | E22 | CGAAUUAUUUUUGUCUCUCUA   | 204397 | S1 | GOI   |                        |
| hsa-miR-103    | 119 | 357 | E23 | AGCAGCAUUGUACAGGGCUAUGA | 204063 | S1 | Ref   | Reference gene         |
| hsa-miR-103    | 120 | 373 | E24 | AGCAGCAUUGUACAGGGCUAUGA | 204063 | S1 | Ref   | Reference gene         |
| hsa-miR-185    | 121 | 6   | F01 | UGGAGAGAAAGGCAGUCCUGA   | 204475 | S2 | GOI   |                        |
| hsa-miR-20b    | 122 | 22  | F02 | CAAAGUGCUCAUAGUCAGGUAG  | 204755 | S2 | GOI   |                        |
| hsa-miR-107    | 123 | 38  | F03 | AGCAGCAUUGUACAGGGCUAUGA | 204468 | S2 | GOI   |                        |
| hsa-miR-502-3p | 124 | 54  | F04 | AAUGCACCUGGGCAAGGAUUA   | 204043 | S2 | GOI   |                        |
| hsa-miR-222    | 125 | 70  | F05 | AGCUACAUCUGGCUCUAGGGU   | 204551 | S2 | GOI   |                        |
| hsa-miR-93*    | 126 | 86  | F06 | ACUGCUGAGCUAGCACUCCCG   | 204470 | S2 | GOI   |                        |
| hsa-miR-342-3p | 127 | 102 | F07 | UCUCACACAGAAUCCGCCCGU   | 204511 | S2 | GOI   |                        |
| hsa-miR-30a    | 128 | 118 | F08 | UGUAAACAUCUCGACUGGAAG   | 204791 | S2 | GOI   |                        |
| hsa-miR-1974   | 129 | 134 | F09 | UGGUUGUAGUCCUGCGAGAAUA  | 204662 | S2 | GOI   | Obsolete in miRbase 16 |
| hsa-miR-29b    | 130 | 150 | F10 | UAGCACCAUUUGAAAUCAGUUU  | 204679 | S2 | GOI   |                        |
| hsa-miR-23b    | 131 | 166 | F11 | AUCACAUCUGCCAGGGUUUACC  | 204790 | S2 | GOI   |                        |
| hsa-miR-505    | 132 | 182 | F12 | CGUCAACAUUGCUGGUUUCCU   | 204214 | S2 | GOI   |                        |
| hsa-miR-423-3p | 133 | 198 | F13 | AGCUCGGUCUGAGGCCCCUCAGU | 204488 | S2 | GOI   |                        |
| hsa-miR-223*   | 134 | 214 | F14 | CGUGUAUUUGACAAGCUGAGUU  | 204529 | S2 | GOI   |                        |
| hsa-miR-30b    | 135 | 230 | F15 | UGUAAACAUCUACACUCAGCU   | 204765 | S2 | GOI   |                        |
| hsa-miR-532-5p | 136 | 246 | F16 | CAUGCCUUGAGUGUAGGACCGU  | 204221 | S2 | GOI   |                        |
| hsa-let-7f     | 137 | 262 | F17 | UGAGGUAGUAGAUUGUAUGUU   | 204359 | S2 | GOI   |                        |
| UniSp3 IPC     | 138 | 278 | F18 |                         |        | S2 | IPC   | Inter-plate calibrator |
| UniSp3 IPC     | 139 | 294 | F19 |                         |        | S2 | IPC   | Inter-plate calibrator |
| hsa-miR-106b*  | 140 | 310 | F20 | CCGCACUGUGGGUACUUGCUGC  | 204020 | S2 | GOI   |                        |
| hsa-miR-181a   | 141 | 326 | F21 | AACAUUCAACGCUGUCGGUGAGU | 204566 | S2 | GOI   |                        |
| hsa-miR-15b*   | 142 | 342 | F22 | CGAAUUAUUUUUGUCUCUCUA   | 204397 | S2 | GOI   |                        |
| hsa-miR-103    | 143 | 358 | F23 | AGCAGCAUUGUACAGGGCUAUGA | 204063 | S2 | Ref   | Reference gene         |
| hsa-miR-103    | 144 | 374 | F24 | AGCAGCAUUGUACAGGGCUAUGA | 204063 | S2 | Ref   | Reference gene         |
| hsa-miR-144    | 145 | 7   | G01 | UACAGUAUAGAUGAUGUACU    | 204754 | S1 | GOI   |                        |
| hsa-let-7c     | 146 | 23  | G02 | UGAGGUAGUAGGUUGUAUGUU   | 204767 | S1 | GOI   |                        |
| hsa-miR-30c    | 147 | 39  | G03 | UGUAAACAUCUACACUCUAGC   | 204783 | S1 | GOI   |                        |
| hsa-miR-122    | 148 | 55  | G04 | UGGAGUGUGACAAUGGUUUUG   | 204090 | S1 | GOI   |                        |
| hsa-miR-145    | 149 | 71  | G05 | GUCCAGUUUUCCAGGAUCCCU   | 204483 | S1 | GOI   |                        |
| hsa-miR-766    | 150 | 87  | G06 | ACUCCAGCCCCACAGCCUCAGC  | 204499 | S1 | GOI   |                        |
| hsa-miR-26b    | 151 | 103 | G07 | UUCAAGUAAUUCAGGAUAGGU   | 204172 | S1 | GOI   |                        |
| hsa-miR-10a    | 152 | 119 | G08 | UACCCUGUAGAUCCGAAUUUGUG | 204778 | S1 | GOI   |                        |
| hsa-miR-197    | 153 | 135 | G09 | UUCACCACCUUCCACCCAGC    | 204380 | S1 | GOI   |                        |
| hsa-miR-301a   | 154 | 151 | G10 | CAGUGCAAUAGUAUUUGCAAAGC | 204687 | S1 | GOI   |                        |
| hsa-miR-192    | 155 | 167 | G11 | CUGACCUAUGAAUUGACAGCC   | 204099 | S1 | GOI   |                        |
| hsa-miR-346    | 156 | 183 | G12 | UGUCUGCCCGCAUGCCUGCCUCU | 204538 | S1 | GOI   |                        |
| hsa-miR-151-3p | 157 | 199 | G13 | CUAGACUGAAGCUCUUGAGG    | 204576 | S1 | GOI   |                        |
| hsa-miR-425*   | 158 | 215 | G14 | AUCGGGAUUGUCGUGUCCGCC   | 204038 | S1 | GOI   |                        |
| hsa-miR-27b    | 159 | 231 | G15 | UUCAAGUUGGCUAAGUUCUGC   | 204782 | S1 | GOI   |                        |
| hsa-let-7b*    | 160 | 247 | G16 | CUAUACAACCUACUGCCUCCCC  | 204209 | S1 | GOI   |                        |
| hsa-miR-186    | 161 | 263 | G17 | CAAAGAAUUCUCCUUUUUGGGCU | 204015 | S1 | GOI   |                        |
| UniSp6 CP      | 162 | 279 | G18 |                         |        | S1 | Spike | Spike control          |
| UniSp6 CP      | 163 | 295 | G19 |                         |        | S1 | Spike | Spike control          |
| hsa-miR-128    | 164 | 311 | G20 | UCACAGUGAACCCGGUCUCUUU  | 204626 | S1 | GOI   |                        |
| hsa-let-7i     | 165 | 327 | G21 | UGAGGUAGUAGUUUGUCUGUU   | 204394 | S1 | GOI   |                        |
| hsa-miR-32     | 166 | 343 | G22 | UAUUGCAUUAUUAAGUUUGCA   | 204792 | S1 | GOI   |                        |
| hsa-miR-425    | 167 | 359 | G23 | AAUGACAGAUACACUCCGUUGA  | 204337 | S1 | Ref   | Reference gene         |
| hsa-miR-425    | 168 | 375 | G24 | AAUGACAGAUACACUCCGUUGA  | 204337 | S1 | Ref   | Reference gene         |
| hsa-miR-144    | 169 | 8   | H01 | UACAGUAUAGAUGAUGUACU    | 204754 | S2 | GOI   |                        |
| hsa-let-7c     | 170 | 24  | H02 | UGAGGUAGUAGGUUGUAUGUU   | 204767 | S2 | GOI   |                        |
| hsa-miR-30c    | 171 | 40  | H03 | UGUAAACAUCUACACUCUAGC   | 204783 | S2 | GOI   |                        |
| hsa-miR-122    | 172 | 56  | H04 | UGGAGUGUGACAAUGGUUUUG   | 204090 | S2 | GOI   |                        |
| hsa-miR-145    | 173 | 72  | H05 | GUCCAGUUUUCCAGGAUCCCU   | 204483 | S2 | GOI   |                        |
| hsa-miR-766    | 174 | 88  | H06 | ACUCCAGCCCCACAGCCUCAGC  | 204499 | S2 | GOI   |                        |

Supplementary Table 1. LNA primers against 179 circulating miRNAs used for plate screening.

|                 |     |     |     |                         |        |    |       |                |
|-----------------|-----|-----|-----|-------------------------|--------|----|-------|----------------|
| hsa-miR-26b     | 175 | 104 | H07 | UUCAAAGUAAUUCAGGAUAGGU  | 204172 | S2 | GOI   |                |
| hsa-miR-10a     | 176 | 120 | H08 | UACCCUGUAGAUCCGAAUUUGUG | 204778 | S2 | GOI   |                |
| hsa-miR-197     | 177 | 136 | H09 | UUCACCACCUUCCACCCAGC    | 204380 | S2 | GOI   |                |
| hsa-miR-301a    | 178 | 152 | H10 | CAGUGCAAUAGUAUUUCAAAGC  | 204687 | S2 | GOI   |                |
| hsa-miR-192     | 179 | 168 | H11 | CUGACCUAUGAAUUGACAGCC   | 204099 | S2 | GOI   |                |
| hsa-miR-346     | 180 | 184 | H12 | UGUCUGCCCGCAUUGCCUCCU   | 204538 | S2 | GOI   |                |
| hsa-miR-151-3p  | 181 | 200 | H13 | CUAGACUGAAGCCUUGAGG     | 204576 | S2 | GOI   |                |
| hsa-miR-425*    | 182 | 216 | H14 | AUCGGAAUGUCGUGUCCGCC    | 204038 | S2 | GOI   |                |
| hsa-miR-27b     | 183 | 232 | H15 | UUCACAGUGGCUAAGUUCUGC   | 204782 | S2 | GOI   |                |
| hsa-let-7b*     | 184 | 248 | H16 | CUAUACAACCUACUCCUCC     | 204209 | S2 | GOI   |                |
| hsa-miR-186     | 185 | 264 | H17 | CAAAGAAUUCUCCUUUUGGGU   | 204015 | S2 | GOI   |                |
| UniSp6 CP       | 186 | 280 | H18 |                         |        | S2 | Spike | Spike control  |
| UniSp6 CP       | 187 | 296 | H19 |                         |        | S2 | Spike | Spike control  |
| hsa-miR-128     | 188 | 312 | H20 | UCACAGUGAACCGGUCUCUU    | 204626 | S2 | GOI   |                |
| hsa-let-7i      | 189 | 328 | H21 | UGAGGUAGUAGUUUGUCUGUU   | 204394 | S2 | GOI   |                |
| hsa-miR-32      | 190 | 344 | H22 | UAUUGCACAUAUCUAAAGUUGCA | 204792 | S2 | GOI   |                |
| hsa-miR-425     | 191 | 360 | H23 | AAUGACACGAUCACUCCGUUGA  | 204337 | S2 | Ref   | Reference gene |
| hsa-miR-425     | 192 | 376 | H24 | AAUGACACGAUCACUCCGUUGA  | 204337 | S2 | Ref   | Reference gene |
| hsa-miR-139-5p  | 193 | 9   | I01 | UCUACAGUGCAGGUGUCCAG    | 204037 | S1 | GOI   |                |
| hsa-miR-194     | 194 | 25  | I02 | UGUAACAGCAACUCCAUGUGGA  | 204080 | S1 | GOI   |                |
| hsa-miR-424     | 195 | 41  | I03 | CAGCAGCAAUUCAUUUUGAA    | 204736 | S1 | GOI   |                |
| hsa-miR-18a*    | 196 | 57  | I04 | ACUGCCUAAAGUCCUUCUGG    | 204523 | S1 | GOI   |                |
| hsa-miR-17      | 197 | 73  | I05 | CAAAGUCUUCACAGUCAGGUAG  | 204771 | S1 | GOI   |                |
| hsa-miR-106b    | 198 | 89  | I06 | UAAAGUGCUGACAGUGCAGAU   | 204760 | S1 | GOI   |                |
| hsa-miR-143     | 199 | 105 | I07 | UGAGAUAGACUGUAGCUC      | 204190 | S1 | GOI   |                |
| hsa-miR-136     | 200 | 121 | I08 | ACUCCAUUUUUUGAUGAUGGA   | 204779 | S1 | GOI   |                |
| hsa-miR-199a-3p | 201 | 137 | I09 | ACAGUAGUCUGACACAUUGGUUA | 204536 | S1 | GOI   |                |
| hsa-miR-501-3p  | 202 | 153 | I10 | AAUGCACCCTGGCAAGGAUUCU  | 204178 | S1 | GOI   |                |
| hsa-miR-29c     | 203 | 169 | I11 | UAGCACCAUUUGAAUCCGUUA   | 204729 | S1 | GOI   |                |
| hsa-miR-154     | 204 | 185 | I12 | UAGGUUAUCCGUGUUGCCUUCG  | 204518 | S1 | GOI   |                |
| hsa-miR-146a    | 205 | 201 | I13 | UGAGAACUGAAUCCAUGGGUU   | 204688 | S1 | GOI   |                |
| hsa-miR-127-3p  | 206 | 217 | I14 | UCGGAUCCGUCUGAGCUUGGCU  | 204048 | S1 | GOI   |                |
| hsa-miR-29a     | 207 | 233 | I15 | UAGCACCAUCUGAAAUCCGUUA  | 204698 | S1 | GOI   |                |
| hsa-miR-30e*    | 208 | 249 | I16 | CUUUCAGUCGGUUGUUACAGC   | 204410 | S1 | GOI   |                |
| hsa-miR-99a     | 209 | 265 | I17 | AACCCGUAAGUCCGAUCUUGUG  | 204521 | S1 | GOI   |                |
| hsa-miR-326     | 210 | 281 | I18 | CCUCUGGGCCUUCUCCAG      | 204512 | S1 | GOI   |                |
| hsa-miR-152     | 211 | 297 | I19 | UCAGUGCAUGACAGAACUUGG   | 204294 | S1 | GOI   |                |
| hsa-miR-133a    | 212 | 313 | I20 | UUUGGUCCCUUCAACCAGCUG   | 204788 | S1 | GOI   |                |
| hsa-miR-148a    | 213 | 329 | I21 | UCAGUGCACUACAGAACUUUGU  | 204121 | S1 | GOI   |                |
| hsa-miR-495     | 214 | 345 | I22 | AAACAAACAUUGGUCACUUCUU  | 204768 | S1 | GOI   |                |
| hsa-miR-423-5p  | 215 | 361 | I23 | UGAGGGCAGAGAGCGAGACUUU  | 204593 | S1 | Ref   | Reference gene |
| hsa-miR-423-5p  | 216 | 377 | I24 | UGAGGGCAGAGAGCGAGACUUU  | 204593 | S1 | Ref   | Reference gene |
| hsa-miR-139-5p  | 217 | 10  | J01 | UCUACAGUGCAGGUGUCCAG    | 204037 | S2 | GOI   |                |
| hsa-miR-194     | 218 | 26  | J02 | UGUAACAGCAACUCCAUGUGGA  | 204080 | S2 | GOI   |                |
| hsa-miR-424     | 219 | 42  | J03 | CAGCAGCAAUUCAUUUUGAA    | 204736 | S2 | GOI   |                |
| hsa-miR-18a*    | 220 | 58  | J04 | ACUGCCUAAAGUCCUUCUGG    | 204523 | S2 | GOI   |                |
| hsa-miR-17      | 221 | 74  | J05 | CAAAGUCUUCACAGUCAGGUAG  | 204771 | S2 | GOI   |                |
| hsa-miR-106b    | 222 | 90  | J06 | UAAAGUGCUGACAGUGCAGAU   | 204760 | S2 | GOI   |                |
| hsa-miR-143     | 223 | 106 | J07 | UGAGAUAGACUGUAGCUC      | 204190 | S2 | GOI   |                |
| hsa-miR-136     | 224 | 122 | J08 | ACUCCAUUUUUUGAUGAUGGA   | 204779 | S2 | GOI   |                |
| hsa-miR-199a-3p | 225 | 138 | J09 | ACAGUAGUCUGACACAUUGGUUA | 204536 | S2 | GOI   |                |
| hsa-miR-501-3p  | 226 | 154 | J10 | AAUGCACCCTGGCAAGGAUUCU  | 204178 | S2 | GOI   |                |
| hsa-miR-29c     | 227 | 170 | J11 | UAGCACCAUUUGAAUCCGUUA   | 204729 | S2 | GOI   |                |
| hsa-miR-154     | 228 | 186 | J12 | UAGGUUAUCCGUGUUGCCUUCG  | 204518 | S2 | GOI   |                |
| hsa-miR-146a    | 229 | 202 | J13 | UGAGAACUGAAUCCAUGGGUU   | 204688 | S2 | GOI   |                |
| hsa-miR-127-3p  | 230 | 218 | J14 | UCGGAUCCGUCUGAGCUUGGCU  | 204048 | S2 | GOI   |                |
| hsa-miR-29a     | 231 | 234 | J15 | UAGCACCAUCUGAAAUCCGUUA  | 204698 | S2 | GOI   |                |
| hsa-miR-30e*    | 232 | 250 | J16 | CUUUCAGUCGGUUGUUACAGC   | 204410 | S2 | GOI   |                |
| hsa-miR-99a     | 233 | 266 | J17 | AACCCGUAAGUCCGAUCUUGUG  | 204521 | S2 | GOI   |                |

Supplementary Table 1. LNA primers against 179 circulating miRNAs used for plate screening.

|                 |     |     |     |                          |        |    |     |                |
|-----------------|-----|-----|-----|--------------------------|--------|----|-----|----------------|
| hsa-miR-326     | 234 | 282 | J18 | CCUCUGGGCCUUCUCCAG       | 204512 | S2 | GOI |                |
| hsa-miR-152     | 235 | 298 | J19 | UCAGUGCAUGACAGAACUUGG    | 204294 | S2 | GOI |                |
| hsa-miR-133a    | 236 | 314 | J20 | UUUGGUCCCUUCAACAGCUG     | 204788 | S2 | GOI |                |
| hsa-miR-148a    | 237 | 330 | J21 | UCAGUGCACUACAGAACUUUGU   | 204121 | S2 | GOI |                |
| hsa-miR-495     | 238 | 346 | J22 | AAACAAACUUGGUCACUUCUU    | 204768 | S2 | GOI |                |
| hsa-miR-423-5p  | 239 | 362 | J23 | UGAGGGGAGAGAGCGAGACUUU   | 204593 | S2 | Ref | Reference gene |
| hsa-miR-423-5p  | 240 | 378 | J24 | UGAGGGGAGAGAGCGAGACUUU   | 204593 | S2 | Ref | Reference gene |
| hsa-miR-19a     | 241 | 11  | K01 | UGUGCAAUUCUUGCAAAACUGA   | 204781 | S1 | GOI |                |
| hsa-miR-1       | 242 | 27  | K02 | UGGAAUGUAAGAAGUAUGUAU    | 204344 | S1 | GOI |                |
| hsa-miR-30d     | 243 | 43  | K03 | UGUAAACAUCGCCGACUGGAAG   | 204757 | S1 | GOI |                |
| hsa-miR-199a-5p | 244 | 59  | K04 | CCCAGUUCAGACUACCUUUC     | 204494 | S1 | GOI |                |
| hsa-miR-22      | 245 | 75  | K05 | AAGCUGCCAGUUGAAGAACUGU   | 204606 | S1 | GOI |                |
| hsa-miR-20a*    | 246 | 91  | K06 | ACUGCAUUAUGAGCACUAAAAG   | 204052 | S1 | GOI |                |
| hsa-miR-720     | 247 | 107 | K07 | UCUCGCGGGGCCUCCA         | 204088 | S1 | GOI |                |
| hsa-miR-660     | 248 | 123 | K08 | UACCCAUUGCAUUCGGAGUUG    | 204727 | S1 | GOI |                |
| hsa-miR-125b    | 249 | 139 | K09 | UCCUUGAGACCCUAAACUUGUGA  | 204465 | S1 | GOI |                |
| hsa-miR-376a    | 250 | 155 | K10 | AUCAUAGAGGAAAUCACAGU     | 204508 | S1 | GOI |                |
| hsa-miR-378     | 251 | 171 | K11 | ACUGGACUUGGAGUCAGAAGG    | 204179 | S1 | GOI |                |
| hsa-miR-193b    | 252 | 187 | K12 | AACUGGCCUCAAAGUCCCGCU    | 204226 | S1 | GOI |                |
| hsa-miR-125a-5p | 253 | 203 | K13 | UCCUUGAGACCCUUAACCUUGUGA | 204339 | S1 | GOI |                |
| hsa-miR-409-3p  | 254 | 219 | K14 | GAAUGUUCGUCGGUGAACCCU    | 204358 | S1 | GOI |                |
| hsa-miR-148b    | 255 | 235 | K15 | UCAGUGCAUCACAGAACUUUGU   | 204047 | S1 | GOI |                |
| hsa-miR-543     | 256 | 251 | K16 | AAACAUCGCGGUGCACUUCUU    | 204447 | S1 | GOI |                |
| hsa-miR-484     | 257 | 267 | K17 | UCAGGCUAGUCCCUCCCGAU     | 204448 | S1 | GOI |                |
| hsa-miR-132     | 258 | 283 | K18 | UAACAGUCUACAGCCAUGGUCG   | 204129 | S1 | GOI |                |
| hsa-miR-25      | 259 | 299 | K19 | CAUUGCACUUGUCUCGGUCUGA   | 204361 | S1 | GOI |                |
| hsa-miR-363     | 260 | 315 | K20 | AAUUGCAGGUAUCCAUCUGUA    | 204726 | S1 | GOI |                |
| hsa-miR-99b     | 261 | 331 | K21 | CACCGUAGAACCACCUUGCG     | 204367 | S1 | GOI |                |
| hsa-miR-629     | 262 | 347 | K22 | UGGGUUUJAGUUGGGAGAACU    | 204370 | S1 | GOI |                |
| hsa-miR-93      | 263 | 363 | K23 | CAAAGUCUGUUCGUGCAGGUAG   | 204715 | S1 | Ref | Reference gene |
| hsa-miR-93      | 264 | 379 | K24 | CAAAGUCUGUUCGUGCAGGUAG   | 204715 | S1 | Ref | Reference gene |
| hsa-miR-19a     | 265 | 12  | L01 | UGUGCAAUUCUUGCAAAACUGA   | 204781 | S2 | GOI |                |
| hsa-miR-1       | 266 | 28  | L02 | UGGAAUGUAAGAAGUAUGUAU    | 204344 | S2 | GOI |                |
| hsa-miR-30d     | 267 | 44  | L03 | UGUAAACAUCGCCGACUGGAAG   | 204757 | S2 | GOI |                |
| hsa-miR-199a-5p | 268 | 60  | L04 | CCCAGUUCAGACUACCUUUC     | 204494 | S2 | GOI |                |
| hsa-miR-22      | 269 | 76  | L05 | AAGCUGCCAGUUGAAGAACUGU   | 204606 | S2 | GOI |                |
| hsa-miR-20a*    | 270 | 92  | L06 | ACUGCAUUAUGAGCACUAAAAG   | 204052 | S2 | GOI |                |
| hsa-miR-720     | 271 | 108 | L07 | UCUCGCGGGGCCUCCA         | 204088 | S2 | GOI |                |
| hsa-miR-660     | 272 | 124 | L08 | UACCCAUUGCAUUCGGAGUUG    | 204727 | S2 | GOI |                |
| hsa-miR-125b    | 273 | 140 | L09 | UCCUUGAGACCCUAAACUUGUGA  | 204465 | S2 | GOI |                |
| hsa-miR-376a    | 274 | 156 | L10 | AUCAUAGAGGAAAUCACAGU     | 204508 | S2 | GOI |                |
| hsa-miR-378     | 275 | 172 | L11 | ACUGGACUUGGAGUCAGAAGG    | 204179 | S2 | GOI |                |
| hsa-miR-193b    | 276 | 188 | L12 | AACUGGCCUCAAAGUCCCGCU    | 204226 | S2 | GOI |                |
| hsa-miR-125a-5p | 277 | 204 | L13 | UCCUUGAGACCCUUAACCUUGUGA | 204339 | S2 | GOI |                |
| hsa-miR-409-3p  | 278 | 220 | L14 | GAAUGUUCGUCGGUGAACCCU    | 204358 | S2 | GOI |                |
| hsa-miR-148b    | 279 | 236 | L15 | UCAGUGCAUCACAGAACUUUGU   | 204047 | S2 | GOI |                |
| hsa-miR-543     | 280 | 252 | L16 | AAACAUCGCGGUGCACUUCUU    | 204447 | S2 | GOI |                |
| hsa-miR-484     | 281 | 268 | L17 | UCAGGCUAGUCCCUCCCGAU     | 204448 | S2 | GOI |                |
| hsa-miR-132     | 282 | 284 | L18 | UAACAGUCUACAGCCAUGGUCG   | 204129 | S2 | GOI |                |
| hsa-miR-25      | 283 | 300 | L19 | CAUUGCACUUGUCUCGGUCUGA   | 204361 | S2 | GOI |                |
| hsa-miR-363     | 284 | 316 | L20 | AAUUGCAGGUAUCCAUCUGUA    | 204726 | S2 | GOI |                |
| hsa-miR-99b     | 285 | 332 | L21 | CACCGUAGAACCACCUUGCG     | 204367 | S2 | GOI |                |
| hsa-miR-629     | 286 | 348 | L22 | UGGGUUUJAGUUGGGAGAACU    | 204370 | S2 | GOI |                |
| hsa-miR-93      | 287 | 364 | L23 | CAAAGUCUGUUCGUGCAGGUAG   | 204715 | S2 | Ref | Reference gene |
| hsa-miR-93      | 288 | 380 | L24 | CAAAGUCUGUUCGUGCAGGUAG   | 204715 | S2 | Ref | Reference gene |
| hsa-miR-18b     | 289 | 13  | M01 | UAAAGUCAUCUAGUGCAGUUAG   | 204084 | S1 | GOI |                |
| hsa-miR-182     | 290 | 29  | M02 | UUUGGCAUUGGUAAGACUCACACU | 204264 | S1 | GOI |                |
| hsa-miR-652     | 291 | 45  | M03 | AAUGGCGCCACUAGGGUUGUG    | 204387 | S1 | GOI |                |
| hsa-miR-421     | 292 | 61  | M04 | AUCAACAGACAUUAAUUGGGCGC  | 204603 | S1 | GOI |                |

Supplementary Table 1. LNA primers against 179 circulating miRNAs used for plate screening.

|                |     |     |     |                           |        |    |     |                |
|----------------|-----|-----|-----|---------------------------|--------|----|-----|----------------|
| hsa-miR-331-3p | 293 | 77  | M05 | GCCCCUGGGCCUUAUCCUAGAA    | 204156 | S1 | GOI |                |
| hsa-miR-22*    | 294 | 93  | M06 | AGUUUCUUCAGUGGCAAGCUUUA   | 204255 | S1 | GOI |                |
| hsa-miR-151-5p | 295 | 109 | M07 | UCGAGGAGCUCACAGUCUAGU     | 204007 | S1 | GOI |                |
| hsa-miR-92b    | 296 | 125 | M08 | UAUUGCACUCGUCGCCGCCUCC    | 204384 | S1 | GOI |                |
| hsa-miR-18a    | 297 | 141 | M09 | UAAGGUGCAUCUAGUGCAGAUAG   | 204207 | S1 | GOI |                |
| hsa-miR-29a*   | 298 | 157 | M10 | ACUGAUUUCUUUUGGUGUUCAG    | 204430 | S1 | GOI |                |
| hsa-let-7d     | 299 | 173 | M11 | AGAGGUAGUAGGUUGCAUAGUU    | 204124 | S1 | GOI |                |
| hsa-miR-500a   | 300 | 189 | M12 | UAAUCCUUGCUACCUUGGGUGAGA  | 204794 | S1 | GOI |                |
| hsa-let-7d*    | 301 | 205 | M13 | CUAUACGACCUGCUGCCUUUCU    | 204290 | S1 | GOI |                |
| hsa-miR-103-2* | 302 | 221 | M14 | AGCUUCUUUACAGUGCUGCCUUG   | 204609 | S1 | GOI |                |
| hsa-miR-34a    | 303 | 237 | M15 | UGGCAGUGUCUUAAGCUGGUUGU   | 204486 | S1 | GOI |                |
| hsa-miR-2110   | 304 | 253 | M16 | UUGGGGAAACGGCCGUGAGUG     | 204328 | S1 | GOI |                |
| hsa-let-7b     | 305 | 269 | M17 | UGAGGUAGUAGGUUGUGUGGUU    | 204750 | S1 | GOI |                |
| hsa-miR-574-3p | 306 | 285 | M18 | CACGCUAUGCACACCCACA       | 204365 | S1 | GOI |                |
| hsa-miR-335    | 307 | 301 | M19 | UCAAGAGCAUAACGAAAAUUGU    | 204151 | S1 | GOI |                |
| hsa-miR-29b-2* | 308 | 317 | M20 | CUGGUUUCACAUUGGUGGCUUAG   | 204208 | S1 | GOI |                |
| hsa-miR-590-5p | 309 | 333 | M21 | GAGCUUUAUCAUAAAAGUGCAG    | 204222 | S1 | GOI |                |
| hsa-let-7i*    | 310 | 349 | M22 | CUGCGCAAGCUACUGCCUUGCU    | 204247 | S1 | GOI |                |
| hsa-miR-191    | 311 | 365 | M23 | CAACGGAAUCCCAAAAGCAGCUG   | 204306 | S1 | Ref | Reference gene |
| hsa-miR-191    | 312 | 381 | M24 | CAACGGAAUCCCAAAAGCAGCUG   | 204306 | S1 | Ref | Reference gene |
| hsa-miR-18b    | 313 | 14  | N01 | UAAGGUGCAUCUAGUGCAGUAG    | 204084 | S2 | GOI |                |
| hsa-miR-182    | 314 | 30  | N02 | UUUGGCAUUGGUGAAGACUCACACU | 204264 | S2 | GOI |                |
| hsa-miR-652    | 315 | 46  | N03 | AAUGGGCCACUAGGGUUGUG      | 204387 | S2 | GOI |                |
| hsa-miR-421    | 316 | 62  | N04 | AUCAACAGACAUUAAUUGGGCGC   | 204603 | S2 | GOI |                |
| hsa-miR-331-3p | 317 | 78  | N05 | GCCCCUGGGCCUUAUCCUAGAA    | 204156 | S2 | GOI |                |
| hsa-miR-22*    | 318 | 94  | N06 | AGUUUCUUCAGUGGCAAGCUUUA   | 204255 | S2 | GOI |                |
| hsa-miR-151-5p | 319 | 110 | N07 | UCGAGGAGCUCACAGUCUAGU     | 204007 | S2 | GOI |                |
| hsa-miR-92b    | 320 | 126 | N08 | UAUUGCACUCGUCGCCGCCUCC    | 204384 | S2 | GOI |                |
| hsa-miR-18a    | 321 | 142 | N09 | UAAGGUGCAUCUAGUGCAGAUAG   | 204207 | S2 | GOI |                |
| hsa-miR-29a*   | 322 | 158 | N10 | ACUGAUUUCUUUUGGUGUUCAG    | 204430 | S2 | GOI |                |
| hsa-let-7d     | 323 | 174 | N11 | AGAGGUAGUAGGUUGCAUAGUU    | 204124 | S2 | GOI |                |
| hsa-miR-500a   | 324 | 190 | N12 | UAAUCCUUGCUACCUUGGGUGAGA  | 204794 | S2 | GOI |                |
| hsa-let-7d*    | 325 | 206 | N13 | CUAUACGACCUGCUGCCUUUCU    | 204290 | S2 | GOI |                |
| hsa-miR-103-2* | 326 | 222 | N14 | AGCUUCUUUACAGUGCUGCCUUG   | 204609 | S2 | GOI |                |
| hsa-miR-34a    | 327 | 238 | N15 | UGGCAGUGUCUUAAGCUGGUUGU   | 204486 | S2 | GOI |                |
| hsa-miR-2110   | 328 | 254 | N16 | UUGGGGAAACGGCCGUGAGUG     | 204328 | S2 | GOI |                |
| hsa-let-7b     | 329 | 270 | N17 | UGAGGUAGUAGGUUGUGUGGUU    | 204750 | S2 | GOI |                |
| hsa-miR-574-3p | 330 | 286 | N18 | CACGCUAUGCACACCCACA       | 204365 | S2 | GOI |                |
| hsa-miR-335    | 331 | 302 | N19 | UCAAGAGCAUAACGAAAAUUGU    | 204151 | S2 | GOI |                |
| hsa-miR-29b-2* | 332 | 318 | N20 | CUGGUUUCACAUUGGUGGCUUAG   | 204208 | S2 | GOI |                |
| hsa-miR-590-5p | 333 | 334 | N21 | GAGCUUUAUCAUAAAAGUGCAG    | 204222 | S2 | GOI |                |
| hsa-let-7i*    | 334 | 350 | N22 | CUGCGCAAGCUACUGCCUUGCU    | 204247 | S2 | GOI |                |
| hsa-miR-191    | 335 | 366 | N23 | CAACGGAAUCCCAAAAGCAGCUG   | 204306 | S2 | Ref | Reference gene |
| hsa-miR-191    | 336 | 382 | N24 | CAACGGAAUCCCAAAAGCAGCUG   | 204306 | S2 | Ref | Reference gene |
| hsa-miR-375    | 337 | 15  | O01 | UUUGUUCGUUCGGCUCGCGUGA    | 204362 | S1 | GOI |                |
| hsa-miR-382    | 338 | 31  | O02 | GAAGUUGUUCGUGGUGGUAUUCG   | 204169 | S1 | GOI |                |
| hsa-miR-374b   | 339 | 47  | O03 | AUAUAUAACAACCUAAGUG       | 204608 | S1 | GOI |                |
| hsa-miR-95     | 340 | 63  | O04 | UUCAACGGGUAAUUUUGAGCA     | 204288 | S1 | GOI |                |
| hsa-miR-215    | 341 | 79  | O05 | AUGACCUAUGAAUUGACAGAC     | 204598 | S1 | GOI |                |
| hsa-miR-361-3p | 342 | 95  | O06 | UCCCCAGGUGUGAUUCUGAUUU    | 204008 | S1 | GOI |                |
| hsa-miR-10b    | 343 | 111 | O07 | UACCCUUGAGAACCGAAUUUGUG   | 204753 | S1 | GOI |                |
| hsa-miR-133b   | 344 | 127 | O08 | UUUGUCCCUUCAACACAGCUA     | 204162 | S1 | GOI |                |
| hsa-miR-140-3p | 345 | 143 | O09 | UACCACAGGGUAGAACCACGG     | 204304 | S1 | GOI |                |
| hsa-miR-324-3p | 346 | 159 | O10 | ACUGCCCGAGGUGCUGCUGG      | 204303 | S1 | GOI |                |
| hsa-miR-130a   | 347 | 175 | O11 | CAGUGCAAUGUAAAAGGGCAU     | 204658 | S1 | GOI |                |
| hsa-miR-200c   | 348 | 191 | O12 | UAAUACUGCCGGUAAUGAUUGGA   | 204482 | S1 | GOI |                |
| hsa-miR-338-3p | 349 | 207 | O13 | UCCAGCAUCAGUGAUUUUGUUG    | 204719 | S1 | GOI |                |
| hsa-miR-605    | 350 | 223 | O14 | UAAAUCCAUUGGUCUUCUCCU     | 204596 | S1 | GOI |                |
| hsa-miR-324-5p | 351 | 239 | O15 | CGCAUCCCUAGGGCAUUGGUGU    | 204057 | S1 | GOI |                |

Supplementary Table 1. LNA primers against 179 circulating miRNAs used for plate screening.

|                |     |     |     |                         |        |    |            |
|----------------|-----|-----|-----|-------------------------|--------|----|------------|
| hsa-miR-485-3p | 352 | 255 | O16 | GUCAUACACGGCUCUCCUCUCU  | 204049 | S1 | GOI        |
| hsa-miR-33a    | 353 | 271 | O17 | GUGCAUUGUAGUUGCAUUGCA   | 204632 | S1 | GOI        |
| hsa-miR-885-5p | 354 | 287 | O18 | UCCAUAACACUACCCUGCCUCU  | 204473 | S1 | GOI        |
| hsa-miR-195    | 355 | 303 | O19 | UAGCAGCACAGAAAUUUGGC    | 204186 | S1 | GOI        |
| hsa-miR-297    | 356 | 319 | O20 | AUGUAUGUGUCAUGUGCAUG    | 204653 | S1 | GOI        |
| hsa-miR-365    | 357 | 335 | O21 | UAAUGCCCCUAAAAUCCUUAU   | 204622 | S1 | GOI        |
| hsa-miR-551b   | 358 | 351 | O22 | GCGACCAUACUUGGUUUCAG    | 204067 | S1 | GOI        |
| Blank (H2O)    | 359 | 367 | O23 |                         |        | S1 | Empty well |
| Blank (H2O)    | 360 | 383 | O24 |                         |        | S1 | Empty well |
| hsa-miR-375    | 361 | 16  | P01 | UUUGUUCGUUCGGCUCGGUGA   | 204362 | S2 | GOI        |
| hsa-miR-382    | 362 | 32  | P02 | GAAGUUGUUCGUGGGAUUCG    | 204169 | S2 | GOI        |
| hsa-miR-374b   | 363 | 48  | P03 | AUAUAUAACAACCGCUAAGUG   | 204608 | S2 | GOI        |
| hsa-miR-95     | 364 | 64  | P04 | UUCAACGGGUUUUUUUGAGCA   | 204288 | S2 | GOI        |
| hsa-miR-215    | 365 | 80  | P05 | AUGACCUAUGAAUUGACAGAC   | 204598 | S2 | GOI        |
| hsa-miR-361-3p | 366 | 96  | P06 | UCCCCAGGUGUGAUUCUGAUUU  | 204008 | S2 | GOI        |
| hsa-miR-10b    | 367 | 112 | P07 | UACCCUGUAGAACC GAUUUGUG | 204753 | S2 | GOI        |
| hsa-miR-133b   | 368 | 128 | P08 | UUUGGUCCCUUCAACAGCUA    | 204162 | S2 | GOI        |
| hsa-miR-140-3p | 369 | 144 | P09 | UACCACAGGGUAGAACCACGG   | 204304 | S2 | GOI        |
| hsa-miR-324-3p | 370 | 160 | P10 | ACUGCCCAGGUGCUGCUGG     | 204303 | S2 | GOI        |
| hsa-miR-130a   | 371 | 176 | P11 | CAGUGCAAUGUAAAAGGGCAU   | 204658 | S2 | GOI        |
| hsa-miR-200c   | 372 | 192 | P12 | UAAUACUGCCGGUAAUGAUGGA  | 204482 | S2 | GOI        |
| hsa-miR-338-3p | 373 | 208 | P13 | UCCAGCAUCAGUAUUUUGUUG   | 204719 | S2 | GOI        |
| hsa-miR-605    | 374 | 224 | P14 | UAAAUCCAUUGGUCUUCUCCU   | 204596 | S2 | GOI        |
| hsa-miR-324-5p | 375 | 240 | P15 | CGCAUCCCUAGGGCAUUGGUGU  | 204057 | S2 | GOI        |
| hsa-miR-485-3p | 376 | 256 | P16 | GUCAUACACGGCUCUCCUCUCU  | 204049 | S2 | GOI        |
| hsa-miR-33a    | 377 | 272 | P17 | GUGCAUUGUAGUUGCAUUGCA   | 204632 | S2 | GOI        |
| hsa-miR-885-5p | 378 | 288 | P18 | UCCAUAACACUACCCUGCCUCU  | 204473 | S2 | GOI        |
| hsa-miR-195    | 379 | 304 | P19 | UAGCAGCACAGAAAUUUGGC    | 204186 | S2 | GOI        |
| hsa-miR-297    | 380 | 320 | P20 | AUGUAUGUGUCAUGUGCAUG    | 204653 | S2 | GOI        |
| hsa-miR-365    | 381 | 336 | P21 | UAAUGCCCCUAAAAUCCUUAU   | 204622 | S2 | GOI        |
| hsa-miR-551b   | 382 | 352 | P22 | GCGACCAUACUUGGUUUCAG    | 204067 | S2 | GOI        |
| Blank (H2O)    | 383 | 368 | P23 |                         |        | S2 | Empty well |
| Blank (H2O)    | 384 | 384 | P24 |                         |        | S2 | Empty well |

**Supplementary Table 2. Results of logic regression analysis of median miRNA levels on diabetes incidence.** As independent variable: age, body mass index (BMI), arterial hypertension (AH) and diabetes duration. Regression model was analyzed for every miRNA isoform separately.

|                                          | <b>Exp</b>    | <b>CI 2.5%</b>   | <b>CI 97.5%</b>  | <b>p.value</b> |
|------------------------------------------|---------------|------------------|------------------|----------------|
| <b>(Intercept)</b><br><b>let.7i.5p</b>   | <b>130.4</b>  | <b>18.78</b>     | <b>892.3</b>     | <b>0.516</b>   |
| Age [years]                              | -1.141        | -7.553           | -0.171           | 0.502          |
| BMI [kg.m2]                              | -1.693        | -12.10           | -0.062           | 0.538          |
| AH                                       | -0.787        | -11.45           | 6.126            | 0.83           |
| Diabetes.duration [years]                | -0.0681       | -1.117           | 0.944            | 0.884          |
| <b>(Intercept)</b><br><b>miR.199a.3p</b> | <b>2347.6</b> | <b>-401101.7</b> | <b>1894614.7</b> | <b>0.999</b>   |
| Age [years]                              | -23.65        | -19960.7         | 4417.5           | 0.999          |
| BMI [kg.m2]                              | -23.85        | -1978.8          | 2106.4           | 0.999          |
| AH                                       | -76.17        | -12541.6         | 12389.3          | 0.999          |
| Diabetes.duration [years]                | 0.590         | NA               | 2257.9           | 0.999          |
| <b>(Intercept)</b><br><b>miR.20a.3p</b>  | <b>24.40</b>  | <b>-4.726</b>    | <b>84.35</b>     | <b>0.211</b>   |
| Age [years]                              | -0.265        | -0.926           | 0.112            | 0.251          |
| BMI [kg.m2]                              | -0.224        | -0.796           | 0.142            | 0.286          |
| AH                                       | 3.026         | -0.7185          | 9.111            | 0.169          |
| Diabetes.duration [years]                | -0.183        | -1.011           | 0.2151           | 0.503          |
| <b>(Intercept)</b><br><b>miR.221.3p</b>  | <b>-35.67</b> | <b>-132.2</b>    | <b>10.941</b>    | <b>0.290</b>   |
| Age [years]                              | 0.208         | -0.465           | 1.146            | 0.566          |
| <b>BMI [kg.m2]</b>                       | <b>0.556</b>  | <b>0.081</b>     | <b>1.504</b>     | <b>0.080</b>   |
| AH                                       | 0.469         | -6.189           | 7.2634           | 0.870          |
| Diabetes.duration [years]                | 0.447         | -0.275           | 1.896            | 0.408          |
| <b>(Intercept)</b><br><b>miR.26a.5p</b>  | <b>-212.3</b> | <b>-48272.5</b>  | <b>54749.0</b>   | <b>0.999</b>   |
| Age [years]                              | 17.601        | -1374.6          | 1295.3           | 0.999          |
| BMI [kg.m2]                              | -30.84        | -21282.0         | 5174.30          | 0.999          |
| AH                                       | -433.1        | -301585.8        | 73329.6          | 0.999          |
| Diabetes.duration [years]                | 21.88         | -1967.4          | 2011.2           | 0.999          |
| <b>(Intercept)</b><br><b>miR.26b.5p</b>  | <b>8.435</b>  | <b>-17.87</b>    | <b>46.89</b>     | <b>0.549</b>   |
| Age [years]                              | -0.172        | -0.649           | 0.165            | 0.359          |
| BMI [kg.m2]                              | 0.131         | -0.206           | 0.508            | 0.443          |
| AH                                       | 1.0558        | -2.378           | 5.298            | 0.565          |
| Diabetes.duration [years]                | -0.175        | -0.819           | 0.171            | 0.395          |
| <b>(Intercept)</b><br><b>miR.29a.5p</b>  | <b>7.682</b>  | <b>-22.78</b>    | <b>56.83</b>     | <b>0.662</b>   |
| Age [years]                              | 0.0127        | -0.528           | 0.470            | 0.954          |
| BMI [kg.m2]                              | -0.216        | -0.698           | 0.134            | 0.269          |
| AH                                       | -2.147        | -8.109           | 2.101            | 0.346          |
| Diabetes.duration [years]                | -0.087        | -0.921           | 0.361            | 0.751          |



|                                    |                |                  |                  |              |
|------------------------------------|----------------|------------------|------------------|--------------|
| <b>(Intercept)<br/>miR.30b.5p</b>  | <b>130.4</b>   | <b>18.78</b>     | <b>892.3</b>     | <b>0.516</b> |
| Age [years]                        | -1.141         | -7.553           | -0.171           | 0.502        |
| BMI [kg.m2]                        | -1.693         | -12.10           | -0.063           | 0.538        |
| AH                                 | -0.787         | -11.45           | 6.126            | 0.833        |
| Diabetes.duration [years]          | -0.068         | -1.117           | 0.944            | 0.884        |
| <b>(Intercept)<br/>miR.30c.5p</b>  | <b>36997</b>   | <b>-470870.2</b> | <b>1988993.8</b> | <b>0.999</b> |
| Age [years]                        | -44.32         | -25788.2         | 6976.2           | 0.999        |
| BMI [kg.m2]                        | -7.788         | -582.9           | 567.4            | 0.999        |
| AH                                 | 257.93         | -36982.0         | 142418.9         | 0.999        |
| Diabetes.duration [years]          | -68.10         | -36058.8         | 7665.1           | 0.999        |
| <b>(Intercept)<br/>miR.374a.5p</b> | <b>-36.31</b>  | <b>-136.40</b>   | <b>-2.200</b>    | <b>0.150</b> |
| Age [years]                        | 0.474          | 0.021            | 1.717            | 0.145        |
| BMI [kg.m2]                        | 0.146          | -0.362           | 1.003            | 0.615        |
| AH                                 | 1.726          | -3.201           | 12.42            | 0.552        |
| Diabetes.duration [years]          | -0.136         | -1.198           | 0.505            | 0.647        |
| <b>(Intercept)<br/>miR.126.3p</b>  | <b>-18.71</b>  | <b>-60.60</b>    | <b>6.521</b>     | <b>0.206</b> |
| Age [years]                        | 0.233          | -0.103           | 0.727            | 0.220        |
| BMI [kg.m2]                        | 0.057          | -0.314           | 0.496            | 0.759        |
| AH                                 | 0.546          | -3.411           | 4.631            | 0.773        |
| Diabetes.duration [years]          | 0.066          | -0.315           | 0.7266           | 0.756        |
| <b>(Intercept)<br/>miR.126.5p</b>  | <b>-7.676</b>  | <b>-55.15</b>    | <b>19.96</b>     | <b>0.612</b> |
| Age [years]                        | 0.142          | -0.212           | 0.7128           | 0.472        |
| BMI [kg.m2]                        | -0.141         | -0.541           | 0.211            | 0.426        |
| AH                                 | 0.191          | -4.009           | 4.123            | 0.919        |
| Diabetes.duration [years]          | 0.211          | -0.152           | 1.0343           | 0.357        |
| <b>(Intercept)<br/>miR.193b.3p</b> | <b>3003.0</b>  | <b>-474144.7</b> | <b>1147159.3</b> | <b>0.999</b> |
| Age [years]                        | 3.9005         | -401.7           | 389.6            | 0.999        |
| BMI [kg.m2]                        | -90.015        | -333423          | 8054.6           | 0.999        |
| AH                                 | 350.7          | -36641.8         | 157917.6         | 0.999        |
| Diabetes.duration [years]          | -99.91         | -39564.4         | 10662.3          | 0.999        |
| <b>(Intercept)<br/>miR.23b.3p</b>  | <b>-18.706</b> | <b>-60.60</b>    | <b>6.521</b>     | <b>0.206</b> |
| Age [years]                        | 0.233          | -0.103           | 0.727            | 0.220        |
| BMI [kg.m2]                        | 0.057          | -0.314           | 0.496            | 0.759        |
| AH                                 | 0.546          | -3.411           | 4.631            | 0.773        |
| Diabetes.duration [years]          | 0.066          | -0.3151          | 0.727            | 0.756        |

|                                   |               |               |               |              |
|-----------------------------------|---------------|---------------|---------------|--------------|
| <b>(Intercept)<br/>miR.409.3p</b> | <b>68.94</b>  | <b>-10.16</b> | <b>258.24</b> | <b>0.235</b> |
| Age [years]                       | -0.666        | -2.741        | 0.182         | 0.268        |
| BMI [kg.m2]                       | -0.446        | -2.295        | 0.209         | 0.336        |
| AH                                | 5.442         | -0.675        | 20.30         | 0.209        |
| Diabetes.duration [years]         | -1.599        | -5.629        | -0.229        | 0.159        |
| <b>(Intercept)<br/>miR.495.3p</b> | <b>23.14</b>  | <b>-4.714</b> | <b>74.11</b>  | <b>0.192</b> |
| Age [years]                       | -0.321        | -0.944        | 0.051         | 0.163        |
| BMI [kg.m2]                       | -0.060        | -0.510        | 0.332         | 0.754        |
| AH                                | 3.410         | -0.391        | 9.576         | 0.138        |
| Diabetes.duration [years]         | -0.196        | -0.927        | 0.181         | 0.415        |
| <b>(Intercept)<br/>miR.95</b>     | <b>-28.62</b> | <b>-76.35</b> | <b>0.334</b>  | <b>0.110</b> |
| <i>Age [years]</i>                | <i>0.424</i>  | <i>0.025</i>  | <i>1.100</i>  | <i>0.093</i> |
| BMI [kg.m2]                       | 0.0117        | -0.405        | 0.446         | 0.958        |
| AH                                | -2.274        | -8.556        | 1.855         | 0.338        |
| Diabetes.duration [years]         | 0.075         | -0.307        | 0.608         | 0.704        |

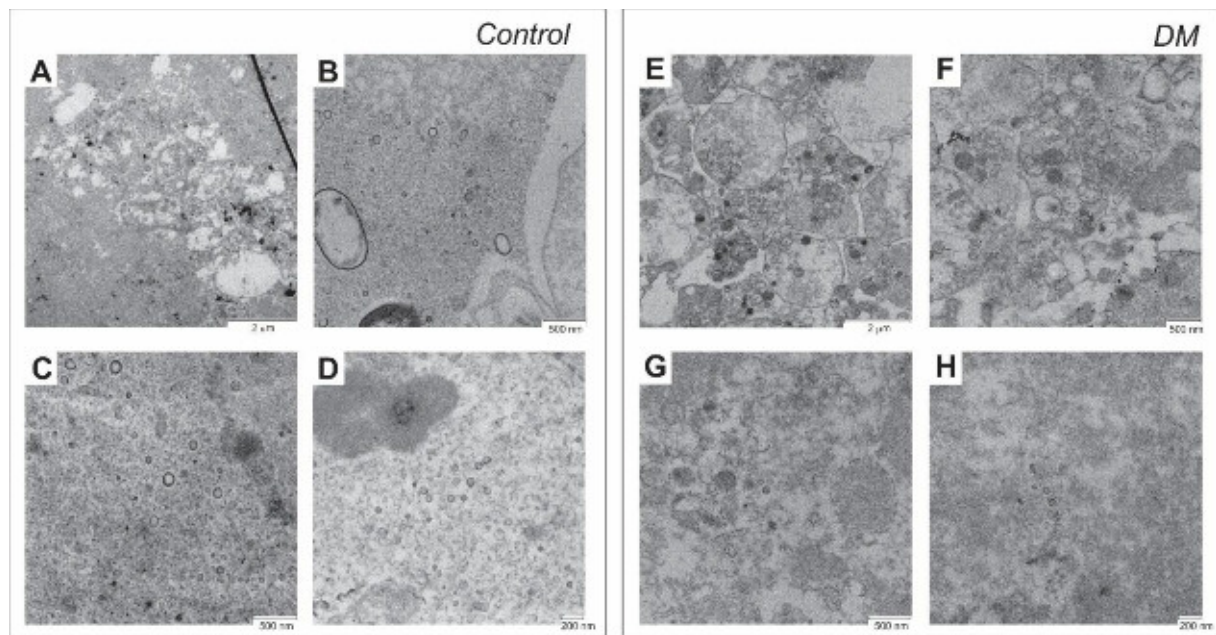

**Supplementary Figure 1. Transmission electron microscopy (TEM) images of circulating EVs in human plasma.** Images obtained from a control subject (A - D) and a patient with diabetes (DM) (E - H). Photographs A and E show a wide field images of the *Ect*-enriched plasma fraction. Photographs B and F are the higher magnification images showing number of vesicles including *Ects* and exosomes. Photographs C, D, G and H show smaller vesicles (exosomes), in majority.
